# Supplementary material for: Design of trifunctional catalysts for promoting sequential condensation, deoxygenation, and aromatization of pyrolyzed mixed waste
Source: Royal Society of Chemistry journal article supplement (doi:10.1039/d3ta01368e), 2023-01-01
Supplement: d3ta01368e1.pdf [file d3ta01368e1.pdf]

## Electronic Supplementary Information

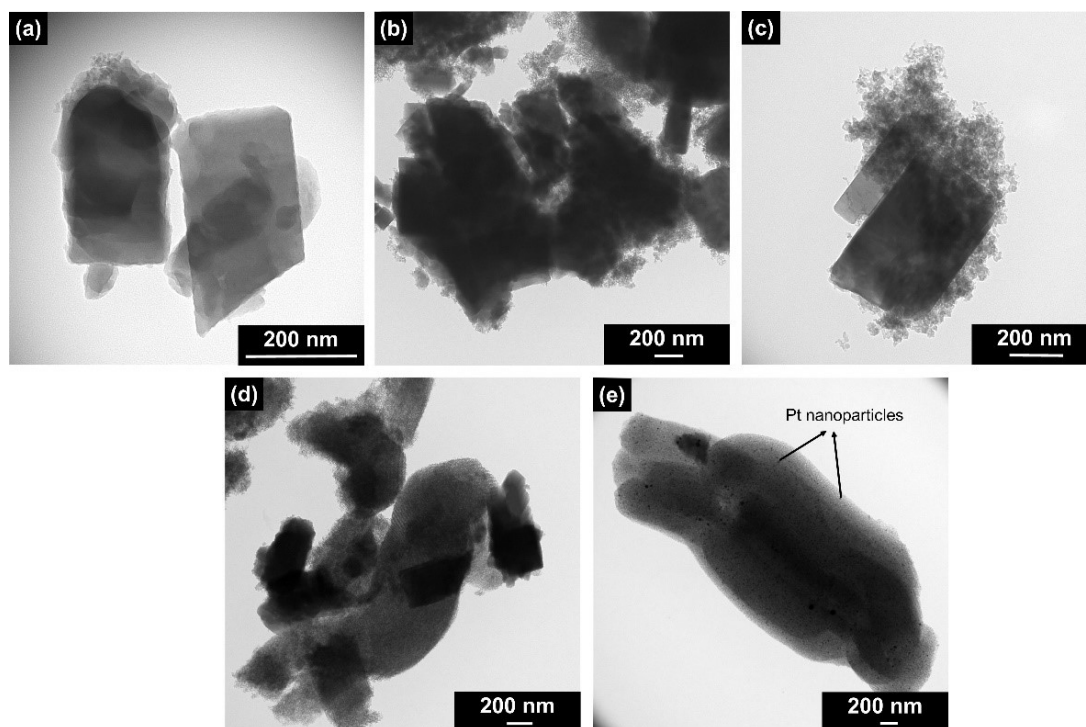

**Fig. S1.** TEM images of the commercial and modified ZSM-5 catalysts (a) ZSM-comm, (b) meso-ZSM, (c) Mg/meso-ZSM, (d) Mg-Ni/meso-ZSM, and (e) Mg-Pt/meso-ZSM.

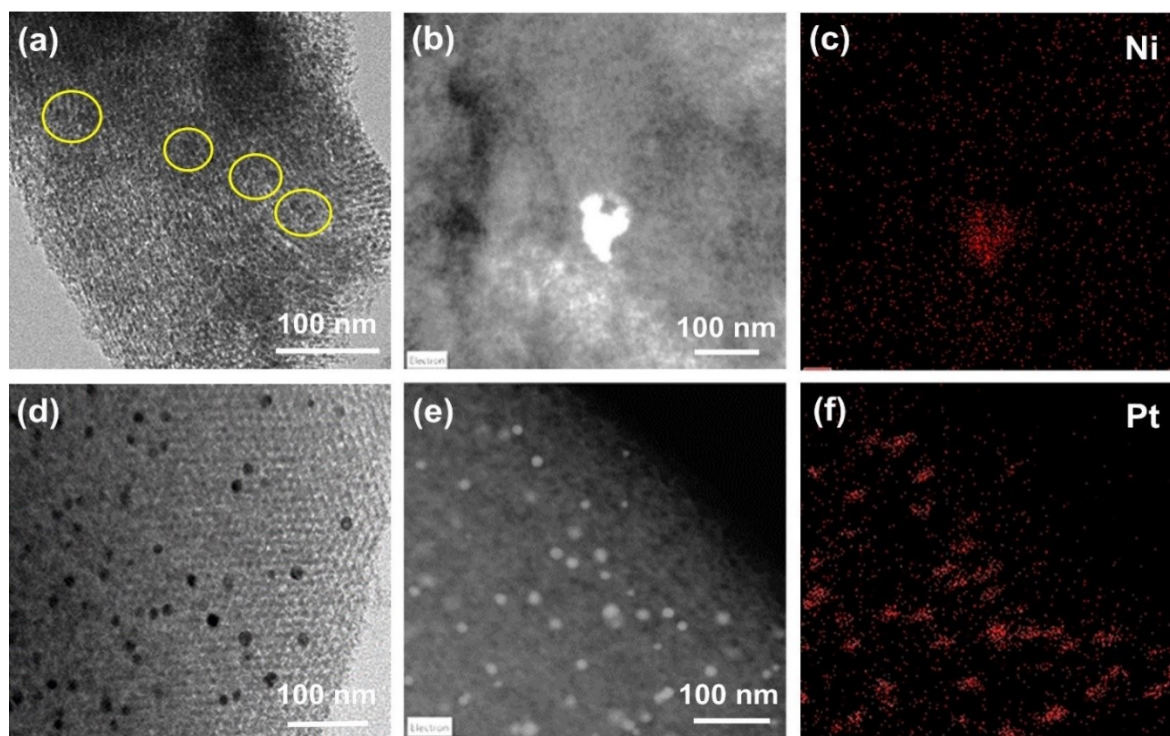

**Fig. S2.** (a) HRTEM and (b) STEM images, and (c) elemental mapping of Mg-Ni/meso-ZSM for Ni. (d) HRTEM and (e) STEM images, and (f) elemental mapping of Mg-Pt/meso-ZSM for Pt.

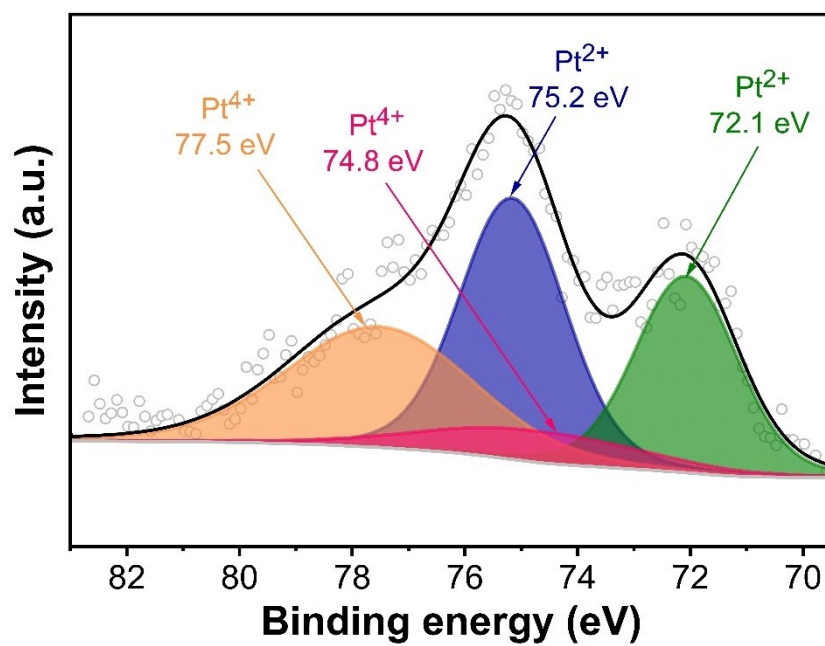

Fig. S3. High-resolution Pt 4f XPS spectrum of Mg/Pt-meso-ZSM.

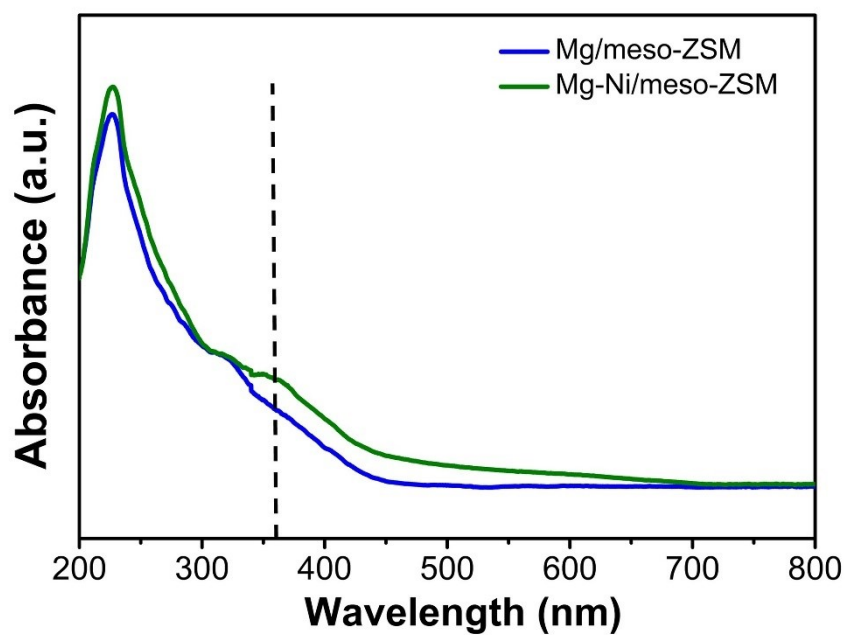

Fig. S4. UV-vis diffuse reflectance spectrum of Mg/Ni-meso-ZSM.

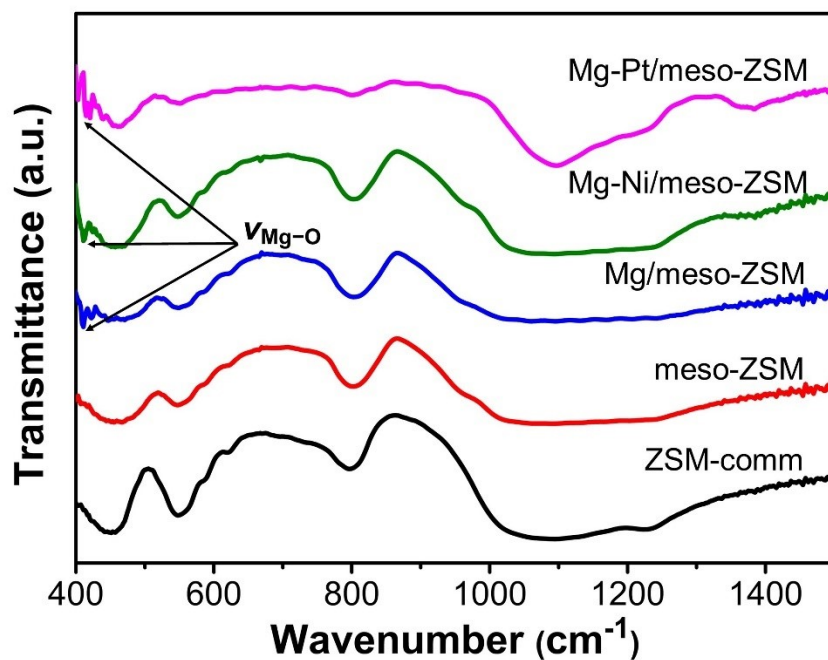

Fig. S5. FTIR spectra of commercial and modified ZSM-5 catalysts.

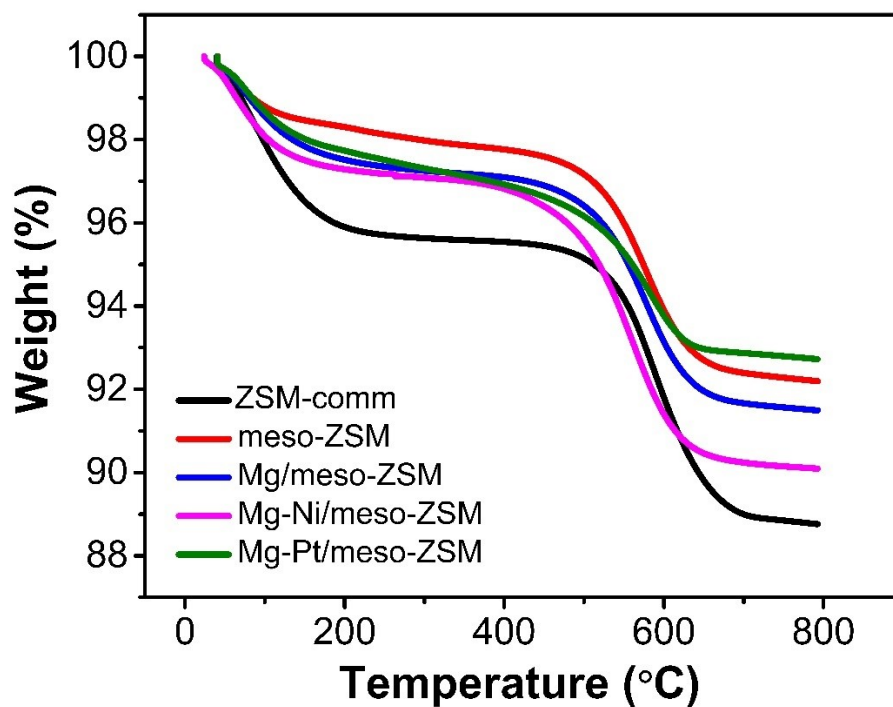

Fig. S6. TG curves of spent catalysts regenerated under air.

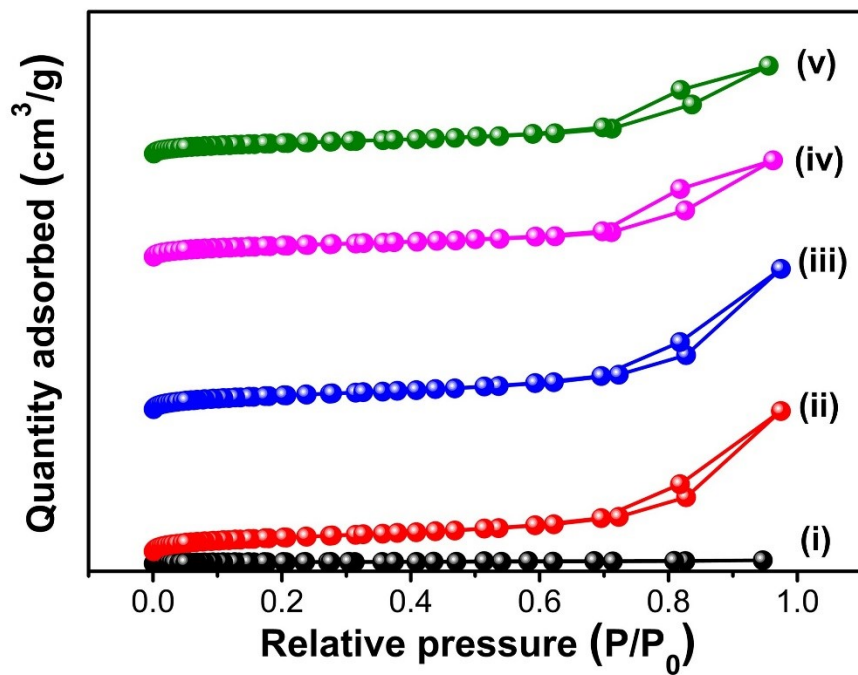

**Fig. S7.** Nitrogen adsorption-desorption isotherms of the spent catalysts: (i) spent ZSM-comm, (ii) spent meso-ZSM, (iii) spent Mg/meso-ZSM, (iv) spent Mg-Ni/meso-ZSM, and (v) spent Mg-Pt/meso-ZSM.

**Table S1.** BET surface area and coke loading of spent catalysts.

| Catalyst       | $S_{\text{BET}}$ (m <sup>2</sup> /g) | Coke loading (%) |
|----------------|--------------------------------------|------------------|
| Comm-ZSM       | 21.70                                | 6.8              |
| meso-ZSM       | 132.2                                | 5.9              |
| Mg/meso-ZSM    | 253.2                                | 5.9              |
| Mg-Ni/meso-ZSM | 123.7                                | 7.0              |
| Mg-Pt/meso-ZSM | 134.9                                | 4.8              |

**Table S2.** Bio-oil product selectivity based on GC-MS peak areas.**Non-cat:**

| <b>Compounds</b>                       | <b>GC – MS Area (%)</b> | <b>Compounds</b>                       | <b>GC –MS Area (%)</b> |
|----------------------------------------|-------------------------|----------------------------------------|------------------------|
| <b>Alcohol</b>                         | <b>0.9</b>              | <b>Phenols</b>                         | <b>39.5</b>            |
| 3-Buten-2-ol, 3-methyl-                | 0.2                     | Phenol, 2-methyl-                      | 0.4                    |
| 2-Heptanol, 6-methyl-                  | 0.8                     | Phenol, 3-methyl-                      | 1.3                    |
| <b>Acids &amp; esters</b>              | <b>13.3</b>             | Phenol, 2-methoxy-                     | 4.2                    |
| Propanoic acid, 2-oxo-, methyl est     | 4.2                     | 1,4-Benzenediol, 2,6-dimethyl-         | 0.4                    |
| Malic Acid                             | 0.3                     | Creosol                                | 5.1                    |
| Propanoic acid, 2-oxo-, ethyl este     | 1.5                     | Catechol                               | 3.3                    |
| 2-Propenoic acid, 2-methyl             | 0.4                     | Catechol                               | 0.9                    |
| 2-Hexenoic acid                        | 0.2                     | 1,2-Benzenediol, 3-methyl-             | 0.6                    |
| Acetoacetic acid, 1-thio-, S-allyl     | 0.5                     | Phenol, 4-ethyl-2-methoxy-             | 1.7                    |
| 2-Hexanone, 4-methyl-                  | 0.2                     | 1,2-Benzenediol, 4-methyl-             | 3.9                    |
| Butanoic acid, 2-oxo-                  | 0.3                     | 2-Methoxy-4-vinylphenol                | 4.9                    |
| 2-Pentenoic acid, 4-methyl-,<br>methy  | 1.1                     | Eugenol                                | 0.9                    |
| Homovanillic acid                      | 1.6                     | Phenol, 2-methoxy-4-propyl-            | 0.2                    |
| Benzoic acid, 4-(methylthio)-, eth     | 0.2                     | Vanillin                               | 2.1                    |
| Homovanillic acid                      | 2.5                     | trans-Isoeugenol                       | 3.1                    |
| Dehydroabietic acid                    | 0.3                     | Apocynin                               | 6.4                    |
| <b>Ketones &amp; aldehydes</b>         | <b>12.9</b>             | <b>Furans</b>                          | <b>16.1</b>            |
| Succindialdehyde                       | 0.4                     | Furfural                               | 3.2                    |
| 2-Pentanone, 4-hydroxy-4-methyl        | 0.5                     | 2-Furanmethanol                        | 3.0                    |
| 2-Cyclopenten-1-one, 2-hydroxy-        | 6.9                     | 2-Furanmethanol                        | 0.3                    |
| 2(5H)-Furanone, 5-methyl-              | 0.3                     | 2(5H)-Furanone                         | 2.2                    |
| Cyclohexanone                          | 0.2                     | 2-Furancarboxaldehyde, 5-<br>methyl    | 0.6                    |
| 2,3-Pentanedione                       | 0.4                     | 2-Furanmethanol                        | 0.3                    |
| 1,2-Cyclopentanedione, 3-methyl-       | 2.6                     | Furan                                  | 0.7                    |
| Cyclopentanone, 2-methyl-              | 1.6                     | 2-Furanmethanol, tetrahydro-5-<br>meth | 0.3                    |
| <b>Sugars</b>                          | <b>17.3</b>             | 5-Hydroxymethylfurfural                | 5.6                    |
| 1,4:3,6-Dianhydro-.alpha.-d-<br>glucop | 1.2                     |                                        |                        |
| .beta.-D-Glucopyranose, 1,6-<br>anhydr | 15.6                    |                                        |                        |
| L-Mannose                              | 0.4                     |                                        |                        |

**ZSM-comm:**

| <b>Compounds</b>                                     | <b>GC –MS<br/>Area (%)</b> | <b>Compounds</b>                  | <b>GC –MS<br/>Area<br/>(%)</b> |
|------------------------------------------------------|----------------------------|-----------------------------------|--------------------------------|
| <b>Alcohols</b>                                      | <b>4.4</b>                 | <b>Phenols</b>                    | <b>10.8</b>                    |
| 1-Pentanol, 2-methyl                                 | 2.78                       | Creosol                           | 3.73                           |
| 1-Heptanol, 2-propyl-                                | 1.26                       | Mequinol                          | 2.87                           |
| 2-Hexyl-1-octanol                                    | 0.43                       | 2-Methoxy-4-vinylphenol           | 1.71                           |
| <b>Aromatics</b>                                     | <b>67.5</b>                | trans-Isoeugenol                  | 1.39                           |
| Toluene                                              | 19.19                      | Phenol, 4-ethyl-2-methoxy-        | 0.89                           |
| o-Xylene                                             | 14.69                      | Phenol, 3-methyl-                 | 0.24                           |
| Benzene                                              | 7.74                       | <b>Furans</b>                     | <b>0.4</b>                     |
| Naphthalene, 2-methyl-                               | 6.49                       | Furan, 2,5-dimethyl-              | 0.26                           |
| Naphthalene                                          | 4.13                       | 2(3H)-Furanone, 5-methyl-         | 0.14                           |
| Naphthalene, 1,4-dimethyl-                           | 2.82                       | <b>Alkanes &amp; alkenes</b>      | <b>7.6</b>                     |
| Benzene, 1-ethyl-3-methyl-                           | 2.16                       | 2-Hexene, 3-methyl-, (Z)-         | 1.81                           |
| Benzene, 1,3-dimethyl-                               | 2.08                       | Hexane, 3-methyl-                 | 1.02                           |
| Ethylbenzene                                         | 1.67                       | 2-Hexene, (E)-                    | 0.76                           |
| Benzene, 1,2,3-trimethyl-                            | 1.36                       | Nonane, 2-methyl-5-propyl-        | 0.62                           |
| Phenanthrene                                         | 1.06                       | Cyclohexene, 1-methyl-            | 0.45                           |
| Anthracene, 9-methyl-                                | 0.92                       | 2-Methyl-2-heptene                | 0.38                           |
| Benzene, 1-propynyl-                                 | 0.71                       | 2-Octene, (E)-                    | 0.35                           |
| Naphthalene, 1,2,3,4-tetrahydro-<br>1,1,6-trimethyl- | 0.65                       | 2-Hexene, 3-methyl-, (Z)-         | 0.38                           |
| Indane                                               | 0.52                       | 2-Heptene                         | 0.27                           |
| 2-Methylindene                                       | 0.36                       | Cyclopentane, 1,2-dimethyl-, cis- | 0.26                           |
| Naphthalene, 1-methyl-                               | 0.36                       | Cyclopropane, pentyl-             | 0.24                           |
| 1,4-Dihydronaphthalene                               | 0.32                       | Cyclobutene, 3,3-dimethyl-        | 0.18                           |
| 1H-Indene, 2,3-dihydro-4-methyl-                     | 0.29                       | 1-Decene                          | 0.17                           |
| <b>Acids &amp; esters</b>                            | <b>3.2</b>                 | Undecane                          | 0.17                           |
| Propanoic acid, 2-oxo-, methyl ester                 | 1.09                       | 1,3,5-Hexatriene, (Z)-            | 0.14                           |
| Acetic acid, (acetyloxy)-                            | 0.87                       | Heptane, 3-methylene-             | 0.14                           |
| Acetic acid, methyl ester                            | 0.73                       | 3-Hexadecene, (Z)-                | 0.14                           |
| 3-Cyclopentylpropionic acid, 2-<br>phenylethyl ester | 0.53                       | Cyclopropane, 1-hexyl-2-methyl-   | 0.11                           |
| <b>Ketones &amp; aldehydes</b>                       | <b>6.0</b>                 |                                   |                                |
| 2-Propanone, 1-hydroxy-                              | 2.34                       |                                   |                                |
| Nonanal                                              | 1.35                       |                                   |                                |
| 2-Cyclopenten-1-one                                  | 0.59                       |                                   |                                |
| Levogluconone                                        | 0.55                       |                                   |                                |
| 2-Cyclohexen-1-one, 4-hydroxy-                       | 0.48                       |                                   |                                |
| Succindialdehyde                                     | 0.35                       |                                   |                                |
| Ethanone, 1-cyclopropyl-                             | 0.32                       |                                   |                                |

**meso-ZSM:**

| <b>Compounds</b>                         | <b>GC –MS<br/>Area (%)</b> | <b>Compounds</b>               | <b>GC –MS<br/>Area (%)</b> |
|------------------------------------------|----------------------------|--------------------------------|----------------------------|
| <b>Alcohols</b>                          | <b>2.9</b>                 | <b>Phenols</b>                 | <b>23.6</b>                |
| 2-Nonen-1-ol                             | 1.36                       | Creosol                        | 5.33                       |
| 1,3-Pentanediol, 4-methyl-2-nitro-       | 0.59                       | Mequinol                       | 3.92                       |
| 1-Heptanol, 2-propyl-                    | 0.48                       | trans-Isoeugenol               | 3.02                       |
| 1,2-Ethanediol, diacetate                | 0.48                       | 2-Methoxy-4-vinylphenol        | 2.50                       |
| <b>Aromatics</b>                         | <b>19.0</b>                | Phenol, 4-ethyl-2-methoxy-     | 2.48                       |
| Toluene                                  | 7.82                       | Vanillin                       | 0.92                       |
| o-Xylene                                 | 4.54                       | Apocynin                       | 0.90                       |
| Benzene                                  | 3.25                       | Phenol, 2-methoxy-4-propyl-    | 0.78                       |
| Naphthalene                              | 1.08                       | Eugenol                        | 0.77                       |
| Naphthalene, 2-methyl-                   | 0.68                       | trans-Isoeugenol               | 0.75                       |
| Ethylbenzene                             | 0.62                       | Phenol, 2-methoxy-4-propyl-    | 0.66                       |
| Benzene, 1-ethyl-2-methyl-               | 0.42                       | trans-Isoeugenol               | 0.60                       |
| Naphthalene, 2,3-dimethyl-               | 0.29                       | 4-(1-Hydroxyallyl)-2-          |                            |
| Styrene                                  | 0.28                       | methoxyphenol                  | 0.54                       |
| <b>Acids &amp; esters</b>                | <b>15.4</b>                | Phenol, 3-methyl-              | 0.40                       |
| Acetic acid                              | 6.22                       | <b>Furans</b>                  | <b>8.7</b>                 |
| Propanoic acid, 2-oxo-, methyl ester     | 3.40                       | Furfural                       | 3.64                       |
| Acetic acid                              | 1.99                       | 2(5H)-Furanone                 | 2.28                       |
| Acetic acid, (acetyloxy)-                | 1.38                       | 2-Furancarboxaldehyde, 5-      |                            |
| Acetic acid, methyl ester                | 1.19                       | methyl-                        | 1.19                       |
| Benzoic acid, cyclohexylmethyl ester     | 0.46                       | 3(2H)-Furanone, dihydro-5-     |                            |
| 6,7-Dioxabicyclo[3.2.2]nonane            | 0.44                       | methyl-                        | 0.71                       |
| Cyclopentanecarboxylic acid, 3-phenyl-2- |                            | 2(3H)-Furanone, 5-methyl-      | 0.56                       |
| propenyl ester                           | 0.32                       | 6-Methoxy-3-                   |                            |
| <b>Ketones &amp; aldehydes</b>           | <b>27.3</b>                | methylbenzofuran               | 0.31                       |
| 2-Propanone, 1-hydroxy-                  | 4.39                       | <b>Alkanes &amp; alkenes</b>   | <b>3.2</b>                 |
| Propanal, 2,3-dihydroxy                  | 3.91                       | 2-Pentene, 3-ethyl-            | 0.63                       |
| 1,2-Cyclopentanedione                    | 3.42                       | 3-Hexene, (Z)-                 | 0.57                       |
| 2-Butanone, 3-methyl-                    | 2.28                       | 2-Hexene, 2-methyl-            | 0.54                       |
| Nonanal                                  | 2.05                       | Decane, 1-chloro-              | 0.46                       |
| 2-Pyrrolidinone, 5-(cyclohexylmethyl)-   | 1.93                       | Hexane, 3-methyl-              | 0.38                       |
| 3-Cyclobutene-1,2-dione, 3,4-dihydroxy   | 1.66                       | 3-Penten-1-yne, (Z)-           | 0.34                       |
| Levoglucosone                            | 1.61                       | 1,3,5-Hexatriene, (Z)-         | 0.27                       |
| 2-Cyclopenten-1-one, 2-hydroxy-3-        |                            | <b>Ketones &amp; aldehydes</b> |                            |
| methyl-                                  | 1.38                       | Ethanone, 1-cyclopropyl-       | 0.45                       |
| Cyclohexanone, 4-methylidene             | 1.02                       | 2-Azaquinolidone-3             | 0.35                       |
| Propan-2-one, 1-(4-isopropoxy-3-         |                            | 2-Cyclopenten-1-one, 2-        |                            |
| methoxyphenyl)-                          | 0.96                       | methyl-                        | 0.28                       |
| 1,3-Cyclopentanedione                    | 0.79                       | 6-Iodohexanal                  | 0.28                       |
| 2-Butanone, 4-hydroxy-3-methyl-          | 0.52                       |                                |                            |

**Mg/meso-ZSM:**

| <b>Compounds</b>                                 | <b>GC –MS<br/>Area (%)</b> | <b>Compounds</b>                  | <b>GC –MS<br/>Area (%)</b> |
|--------------------------------------------------|----------------------------|-----------------------------------|----------------------------|
| <b>Alcohols</b>                                  | <b>2.7</b>                 | <b>Phenols</b>                    | <b>22.8</b>                |
| 1-Heptanol, 2-propyl-                            | 1.16                       | Creosol                           | 5.79                       |
| Glycerin                                         | 0.97                       | Mequinol                          | 4.05                       |
| 1,2:5,6-Dianhydrogalactitol                      | 0.57                       | Phenol, 4-ethyl-2-methoxy-        | 2.58                       |
| <b>Aromatics</b>                                 | <b>20.1</b>                | trans-Isoeugenol                  | 2.53                       |
| Toluene                                          | 7.71                       | 2-Methoxy-4-vinylphenol           | 1.98                       |
| o-Xylene                                         | 4.82                       | Vanillin                          | 0.85                       |
| Benzene                                          | 3.56                       | Eugenol                           | 0.76                       |
| Naphthalene                                      | 1.03                       | Phenol, 2-methoxy-4-propyl-       | 0.68                       |
| Naphthalene, 2-methyl-                           | 0.75                       | Phenol, 3-methyl-                 | 0.67                       |
| Tridemorph                                       | 0.71                       | Phenol, 2-methoxy-4-propyl-       | 0.65                       |
| Ethylbenzene                                     | 0.66                       | Phenol, 3-methyl-                 | 0.52                       |
| Benzene, 1-ethyl-2-methyl-                       | 0.46                       | trans-Isoeugenol                  | 0.52                       |
| Naphthalene, 2,3-dimethyl-                       | 0.37                       | trans-Isoeugenol                  | 0.46                       |
| <b>Acids &amp; esters</b>                        | <b>14.0</b>                | 4-(1-Hydroxyallyl)-2-             |                            |
| Acetic acid                                      | 4.44                       | methoxyphenol                     | 0.46                       |
| Propanoic acid, 2-oxo-, methyl ester             | 3.54                       | 2-Methoxy-5-methylphenol          | 0.27                       |
| Acetic acid, (acetyloxy)-                        | 2.53                       | <b>Furans</b>                     | <b>9.0</b>                 |
| Acetic acid, methyl ester                        | 1.44                       | Furfural                          | 2.94                       |
| 1,4-Dioxin, 2,3-dihydro-                         | 0.94                       | 2(5H)-Furanone                    | 1.92                       |
| 3-Cyclopentylpropionic acid, 2-phenylethyl ester | 0.46                       | 5-Hydroxymethyl-2[5H]-furanone    | 1.71                       |
| Benzoic acid, cyclohexylmethyl ester             | 0.39                       | 2-Furancarboxaldehyde, 5-         |                            |
| Hexanoic acid, oct-3-en-2-yl ester               | 0.25                       | methyl-                           | 1.03                       |
| <b>Ketones &amp; aldehydes</b>                   | <b>24.4</b>                | 2(3H)-Furanone, 5-methyl-         | 0.58                       |
| 2-Propanone, 1-hydroxy-                          | 5.93                       | Furan, 2,5-dimethyl-              | 0.44                       |
| 2-Butanone, 3-methyl-                            | 3.66                       | Furan, 2,3-dihydro-               | 0.35                       |
| Nonanal                                          | 2.67                       | <b>Alkanes &amp; alkenes</b>      | <b>7.1</b>                 |
| Pentanal                                         | 2.02                       | 2-Hexene, 2-methyl-               | 1.19                       |
| Cyclobutene-1,2-dione, 3,4-dihydroxy             | 1.62                       | 2-Hexene, (E)-                    | 1.00                       |
| Levogluosenone                                   | 1.43                       | Hexane, 3-methyl-                 | 0.96                       |
| 2-Cyclopenten-1-one, 2-hydroxy-3-methyl-         | 1.09                       | Tetradecane, 1-chloro-            | 0.65                       |
| Cyclohexanone, 4-methylidene                     | 0.97                       | 1,3-Cyclopentadiene               | 0.44                       |
| Propan-2-one, 1-(4-isopropoxy-3-methoxyphenyl)-  | 0.89                       | 2-Octene, (E)-                    | 0.38                       |
| 6-Oxa-bicyclo[3.1.0]hexan-3-one                  | 0.70                       | 2-Heptene, (E)-                   | 0.37                       |
| Ethanone, 1-cyclopropyl-                         | 1.34                       | Cyclohexene, 1-methyl-            | 0.36                       |
| Succindialdehyde                                 | 0.64                       | 2-Methyl-2-heptene                | 0.32                       |
| 7-Oxabicyclo[2.2.1]heptan-2-one                  | 0.61                       | Cyclobutane, 1,2,3,4-tetramethyl- | 0.28                       |
| 2-Cyclopenten-1-one, 2-methyl-                   | 0.33                       | 2-Hexene, 3-methyl-, (Z)-         | 0.28                       |
| 1,2-Cyclooctanedione                             | 0.29                       | Dodecane                          | 0.26                       |
| 2,3-Pentanedione                                 | 0.25                       | Heptadecane                       | 0.25                       |
|                                                  |                            | Cyclopentene                      | 0.21                       |
|                                                  |                            | 2-Heptene, 3-methyl-              | 0.15                       |



**Mg-Ni/meso-ZSM:**

| <b>Compounds</b>                                 | <b>GC –MS<br/>Area (%)</b> | <b>Compounds</b>                                | <b>GC –<br/>MS<br/>Area<br/>(%)</b> |
|--------------------------------------------------|----------------------------|-------------------------------------------------|-------------------------------------|
| <b>Alcohols &amp; ethers</b>                     | <b>3.1</b>                 | <b>Phenols</b>                                  | <b>16.5</b>                         |
| Hexyl octyl ether                                | 1.73                       | Phenol, 2-methoxy-                              | 3.94                                |
| 4-Hepten-1-ol                                    | 0.83                       | Creosol                                         | 3.91                                |
| 2,6-Cyclooctadien-1-ol                           | 0.51                       | Phenol, 4-ethyl-2-methoxy-                      | 1.65                                |
| <b>Aromatics</b>                                 | <b>23.5</b>                | trans-Isoeugenol                                | 1.35                                |
| Toluene                                          | 9.96                       | 2-Methoxy-4-vinylphenol                         | 0.79                                |
| o-Xylene                                         | 5.85                       | Phenol, 3-methyl-                               | 0.78                                |
| Benzene                                          | 4.78                       | 1,2:5,6-Dianhydrogalactitol                     | 0.77                                |
| Ethylbenzene                                     | 0.87                       | Vanillin                                        | 0.64                                |
| Benzene, 1-ethyl-3-methyl-                       | 0.58                       | Propan-2-one, 1-(4-isopropoxy-3-methoxyphenyl)- | 0.63                                |
| Azulene                                          | 0.53                       | Apocynin                                        | 0.59                                |
| Naphthalene, 1,2,3,4-tetrahydro-1,1,6-trimethyl- | 0.25                       | Phenol, 2-methoxy-4-propyl-                     | 0.45                                |
| Naphthalene, 2-methyl-                           | 0.7                        | Phenol, 2-methoxy-3-(2-propenyl)-               | 0.36                                |
| <b>Acids &amp; esters</b>                        | <b>7.0</b>                 | Phenol, 2-methoxy-4-propyl-                     | 0.34                                |
| Butyl 2-(2-(2-ethoxyethoxy)ethoxy)acetate        | 2.07                       | Phenol, 3-methyl-                               | 0.33                                |
| Acetic acid                                      | 1.78                       | <b>Furans</b>                                   | <b>3.9</b>                          |
| 1,2-Propanediol, 1-acetate                       | 1.62                       | 2(5H)-Furanone                                  | 1.28                                |
| 3-Cyclopentylpropionic acid, 2-phenylethyl ester | 0.82                       | Furan, 2,3-dihydro-5-methyl-                    | 0.98                                |
| Acetic acid, methyl ester                        | 0.35                       | 2-Furancarboxaldehyde, 5-methyl-                | 0.91                                |
| 2-Propenoic acid, 2-methoxyethyl ester           | 0.34                       | 3,4-Furandiol, tetrahydro-, cis-                | 0.58                                |
| <b>Ketones &amp; aldehydes</b>                   | <b>19.6</b>                | 2-Vinylfuran                                    | 0.18                                |
| 3-Cyclopentene-1-acetaldehyde, 2-oxo-            | 3.76                       | <b>Alkanes &amp; alkenes</b>                    | <b>26.3</b>                         |
| Methyl vinyl ketone                              | 3.41                       | 2-Hexene, 3-methyl-, (Z)-                       | 5.1                                 |
| 1,2-Cyclopentanedione                            | 2.67                       | Dodecane                                        | 2.72                                |
| Cyclohexanone, 4-methylidene                     | 1.83                       | Hexane, 3-methyl-                               | 1.91                                |
| 2-Butanone, 4-hydroxy-3-methyl-                  | 1.51                       | Hexane, 2,2,3,3-tetramethyl-                    | 1.14                                |
| 1,2-Cyclopentanedione, 3-methyl-                 | 1.32                       | Heptane, 3-methylene-                           | 1.09                                |
| Nonanal                                          | 1.25                       | 1-Butene, 2,3-dimethyl-                         | 0.85                                |
| 2-Butanone, 4-hydroxy-3-methyl                   | 0.99                       | Heptane, 4-chloro-                              | 0.81                                |
| Levoglucosenone                                  | 0.79                       | Heptadecane, 2,6,10,15-tetramethyl-             | 0.81                                |
| 3-Buten-2-one, 3-methyl-                         | 0.49                       | 2-Hexene, 3-methyl-, (Z)-                       | 0.77                                |
| 2-Butanone, 4-hydroxy-3-methyl-                  | 0.45                       | Pentadecane                                     | 0.74                                |
| 2-Cyclopenten-1-one, 2-methyl-                   | 0.43                       | Heptadecane                                     | 0.71                                |
| 2-Cyclopenten-1-one, 3-methyl-                   | 0.41                       | Tetradecane                                     | 1.24                                |
| 1,2-Cyclopentanedione                            | 0.32                       | Eicosane                                        | 1.83                                |
|                                                  |                            | 2,4-Dimethyl-3-hexene(c,t)                      | 0.62                                |
|                                                  |                            | Undecane, 4,7-dimethyl-                         | 0.61                                |
|                                                  |                            | Cyclopentane, ethylidene                        | 0.53                                |
|                                                  |                            | Undecane                                        | 0.53                                |
|                                                  |                            | 1,3-Pentadiene, (E)-                            | 0.5                                 |
|                                                  |                            | 1-Hexene, 2-methyl-                             | 0.49                                |

|                                        |      |
|----------------------------------------|------|
| 2-Heptene                              | 0.47 |
| Cyclopentene, 3-ethyl-                 | 0.44 |
| 3-Undecene, 6-methyl-, (E)-            | 0.44 |
| 2-Hexene, 5-methyl-, (E)-              | 0.4  |
| 2-Methyl-2-heptene                     | 0.4  |
| 3-Methyl-3-hexene                      | 0.28 |
| Cyclopropane, 2-methylene-1-propionyl- | 0.28 |
| 2-Octene, (E)-                         | 0.25 |
| 2-Octene, (Z)-                         | 0.23 |

---

**Mg-Pt/meso-ZSM:**

| <b>Compounds</b>                                 | <b>GC – MS Area (%)</b> | <b>Compounds</b>                       | <b>GC –MS Area (%)</b> |
|--------------------------------------------------|-------------------------|----------------------------------------|------------------------|
| <b>Alcohols &amp; ethers</b>                     | <b>4.4</b>              | <b>Alkanes &amp; alkenes</b>           | <b>19.6</b>            |
| 1,2-Propanediol, 1-acetate                       | 1.64                    | 2-Hexene, 3-methyl-, (Z)-              | 3.96                   |
| Hexyl octyl ether                                | 1.64                    | Hexane, 3-methyl-                      | 1.64                   |
| 1,2:5,6-Dianhydrogalactitol                      | 0.73                    | Tetradecane, 1-chloro-                 | 1.19                   |
| 1-Heptadec-1-ynyl-cyclopentanol                  | 0.43                    | Cyclopentane, 1,2-dimethyl-, cis-      | 0.83                   |
| <b>Aromatics</b>                                 | <b>28.2</b>             | Heptadecane, 2,6,10,15-tetramethyl-    | 0.75                   |
| Toluene                                          | 11.79                   | Pentadecane                            | 0.69                   |
| o-Xylene                                         | 6.98                    | 2-Hexene, 3-methyl-, (Z)-              | 0.63                   |
| Benzene                                          | 5.71                    | Tetradecane                            | 0.60                   |
| Azulene                                          | 1.08                    | Heptadecane                            | 0.60                   |
| Ethylbenzene                                     | 1.07                    | Tetradecane                            | 0.59                   |
| Naphthalene, 2-methyl-                           | 0.91                    | Undecane                               | 0.57                   |
| Benzene, 1-ethyl-3-methyl-                       | 0.62                    | Heneicosane                            | 0.52                   |
| <b>Acids &amp; esters</b>                        | <b>5.6</b>              | Eicosane                               | 0.50                   |
| Butyl 2-(2-(2-ethoxyethoxy)ethoxy)acetate        | 2.25                    | 2-Pentene, 3-ethyl-2-methyl-           | 0.48                   |
| 3-Cyclopentylpropionic acid, 2-phenylethyl ester | 1.03                    | 2-Methyl-2-heptene                     | 0.44                   |
| Butanoic acid, 3-methyl-                         | 0.89                    | Eicosane                               | 0.44                   |
| Propanoic acid, ethyl ester                      | 0.69                    | 2-Heptene                              | 0.42                   |
| Acetic acid, methyl ester                        | 0.46                    | Methane,                               |                        |
| Formic acid                                      | 0.30                    | (methylsulfinyl)(methylthio)-          | 0.41                   |
| <b>Ketones &amp; aldehydes</b>                   | <b>14.0</b>             | 2-Decene, 5-methyl-, (Z)-              | 0.40                   |
| 1,2-Cyclopentanedione                            | 2.67                    | 1-Hexene, 2-methyl-                    | 0.38                   |
| Nonanal                                          | 2.12                    | 2-Octene, (Z)-                         | 0.16                   |
| Methyl vinyl ketone                              | 1.53                    | 1,3-Cyclohexadiene                     | 0.14                   |
| Cyclohexanone, 4-methylidene                     | 1.38                    | 3-Methylenecyclohexene                 | 0.12                   |
| 1,2-Cyclopentanedione, 3-methyl-                 | 1.26                    | 2-Nonene, (E)-                         | 0.12                   |
| Levogluconone                                    | 1.14                    | 1-Decene                               | 0.11                   |
| Heptanal, 2-methyl-                              | 0.92                    | 2-Decene, 5-methyl-, (Z)-              | 0.40                   |
| 2-Hexanone oxime                                 | 0.60                    | 1-Hexene, 2-methyl-                    | 0.38                   |
| 3-Buten-2-one, 3-methyl-                         | 0.51                    | 2-Octene, (E)-                         | 0.34                   |
| Coniferyl aldehyde                               | 0.45                    | Cyclopentene, 3-ethyl-                 | 0.33                   |
| 2-Butenal                                        | 0.42                    | Heptane, 3-methylene-                  | 0.28                   |
| 2-Cyclopenten-1-one, 2-methyl-                   | 0.38                    | 1-Heptene, 2-methyl-                   | 0.27                   |
| 2-Cyclopenten-1-one, 3-methyl-                   | 0.35                    | Cyclopropane, 2-methylene-1-propionyl- | 0.24                   |
| 1,2-Cyclopentanedione                            | 0.32                    | 1,3-Pentadiene, (E)-                   | 0.23                   |
| Phenols                                          | 0.00                    | 5-Undecene                             | 0.22                   |
| Phenol, 2-methoxy-                               | 5.49                    | Cyclopropane, 1,1,2-trimethyl-         | 0.20                   |
| Creosol                                          | 5.45                    |                                        |                        |
| trans-Isoeugenol                                 | 2.06                    |                                        |                        |
| 2-Methoxy-4-vinylphenol                          | 1.82                    |                                        |                        |
| Phenol, 4-ethyl-2-methoxy-                       | 1.77                    |                                        |                        |
| Vanillin                                         | 1.13                    |                                        |                        |

|                                   |            |
|-----------------------------------|------------|
| Apocynin                          | 0.90       |
| Phenol, 3-methyl-                 | 0.62       |
| Phenol, 2-methoxy-4-propyl-       | 0.59       |
| Phenol, 2-methoxy-3-(2-propenyl)- | 0.38       |
| Phenol, 3-methyl-                 | 0.28       |
| <b>Furans</b>                     | <b>7.7</b> |
| Furan, 2,5-dimethyl               | 3.58       |
| 2(5H)-Furanone                    | 1.40       |
| 2-Furancarboxaldehyde, 5-methyl-  | 0.97       |
| Furan, 2,5-dibutyl-               | 0.90       |
| Furan, 2,3-dihydro-5-methyl       | 0.85       |
